# Supplementary material for: Model Based Analysis of Clonal Developments Allows for Early Detection of Monoclonal Conversion and Leukemia
Source: PLOS journal article supplement (doi:10.1371/journal.pone.0165129), 2016-10-20
Supplement: S4 (10.1371/journal.pone.0165129.s004) [file journal.pone.0165129.s004]

```
initialize max_days
initialize cells according to properties of clones
for days = 1 up to max_days
  for each cell
    if cell proliferate?
      duplicate cell and inherit clonal identity
      increase cell division counter by 1
    if cell(s) differentiate?
      delete cell(s) from proliferating compartment
```
